# Supplementary material
Source: PubMed Central journal article supplement (PMC8154743)
Supplement: NIHMS1703150-supplement-Supplementary_Information.pdf [file NIHMS1703150-supplement-Supplementary_Information.pdf]

## **Supplementary Information**

### **Development of a Sensitive Direct Injection LC-MS/MS Method for the Detection of Glyphosate and Aminomethylphosphonic Acid (AMPA) in Hard Waters**

Jake C. Ulrich and P. Lee Ferguson

<sup>†</sup> Department of Civil and Environmental Engineering, Duke University, Durham, NC, USA

**\*Corresponding Author:** P. Lee Ferguson; Phone: (919) 660-5460; Email:

lee.ferguson@duke.edu; Address: 121 Hudson Hall, Box 90287 Durham, NC 27708-0287

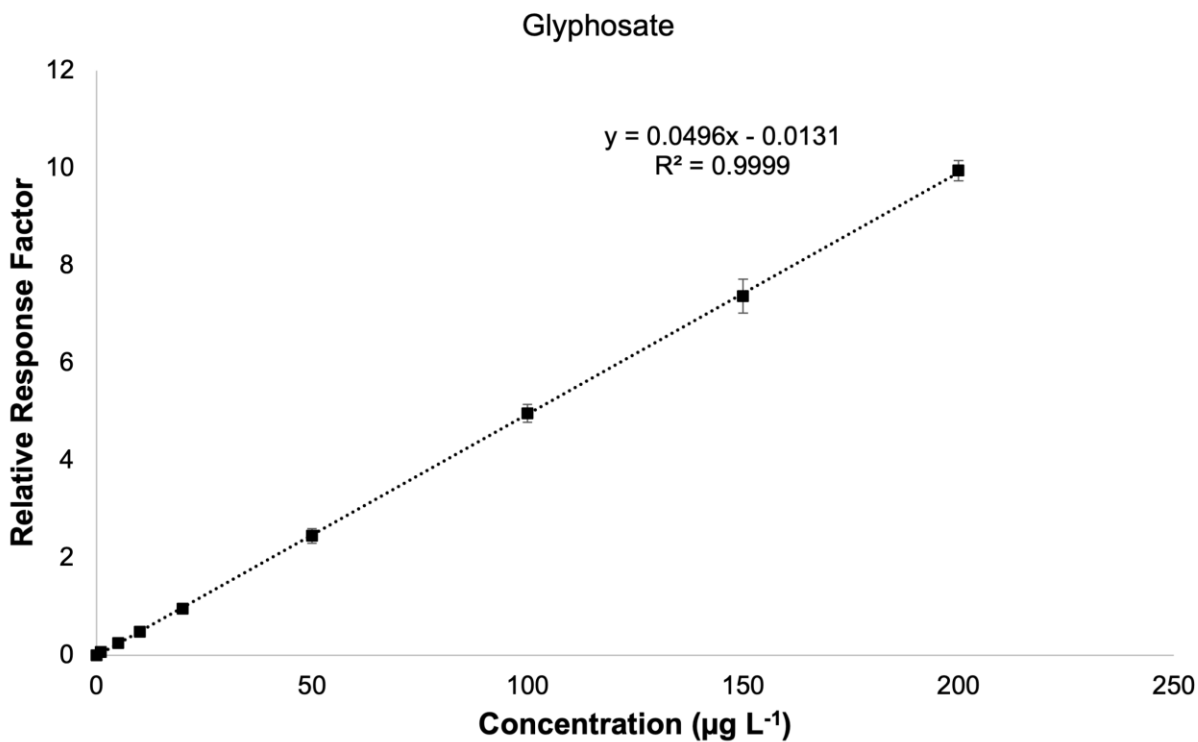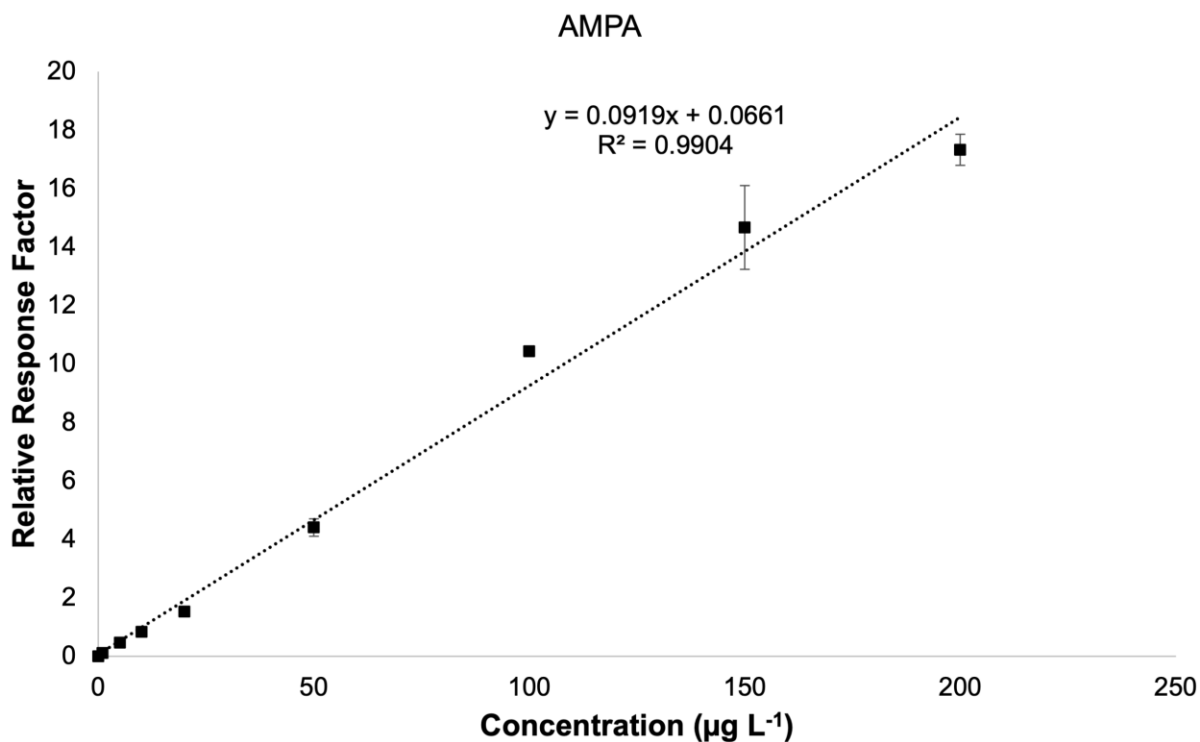

**Fig. S1** Calibration curves generated in triplicate for both glyphosate (top) and AMPA (bottom) plotted relative response factor versus analyte concentration ( $\mu\text{g L}^{-1}$ ). The  $R^2$  values of 0.9999 for glyphosate and 0.9904 for AMPA demonstrate acceptable fit of data to a linear model, suggesting that the calibration responses are linear.

**Table S1** Average predicted concentration and accuracy and precision for standards determined via a triplicate calibration curve analysis.

| Glyphosate                              |                                                             |                  |     | AMPA                                    |                                                             |                  |     |
|-----------------------------------------|-------------------------------------------------------------|------------------|-----|-----------------------------------------|-------------------------------------------------------------|------------------|-----|
| Expected Conc. ( $\mu\text{g L}^{-1}$ ) | Measured average Conc. ( $\pm$ SD) ( $\mu\text{g L}^{-1}$ ) | Accuracy         | RSD | Expected Conc. ( $\mu\text{g L}^{-1}$ ) | Measured average Conc. ( $\pm$ SD) ( $\mu\text{g L}^{-1}$ ) | Accuracy         | RSD |
| <b>0</b>                                | N/F <sup>a</sup>                                            | N/A <sup>a</sup> | N/A | <b>0</b>                                | N/F <sup>a</sup>                                            | N/A <sup>a</sup> | 20% |
| <b>1</b>                                | 1.08 ( $\pm$ 0.09) <sup>b</sup>                             | 108%             | 8%  | <b>1</b>                                | 1.1 ( $\pm$ 0.2)                                            | 119%             | 9%  |
| <b>5</b>                                | 5.0 ( $\pm$ 0.4)                                            | 100%             | 8%  | <b>5</b>                                | 5.1 ( $\pm$ 0.5)                                            | 102%             | 6%  |
| <b>10</b>                               | 9.6 ( $\pm$ 0.2)                                            | 96.2%            | 2%  | <b>10</b>                               | 9.1 ( $\pm$ 0.6)                                            | 91.2%            | 7%  |
| <b>20</b>                               | 19.1 ( $\pm$ 0.9)                                           | 95.7%            | 5%  | <b>20</b>                               | 17 ( $\pm$ 1)                                               | 82.8%            | 7%  |
| <b>50</b>                               | 50 ( $\pm$ 3)                                               | 99.0%            | 6%  | <b>50</b>                               | 48 ( $\pm$ 3)                                               | 94.9%            | 1%  |
| <b>100</b>                              | 101 ( $\pm$ 4)                                              | 101%             | 4%  | <b>100</b>                              | 112 ( $\pm$ 1)                                              | 112%             | 10% |
| <b>150</b>                              | 149 ( $\pm$ 7)                                              | 100%             | 5%  | <b>150</b>                              | 160 ( $\pm$ 20)                                             | 105%             | 3%  |
| <b>200</b>                              | 202 ( $\pm$ 4)                                              | 101%             | 2%  | <b>200</b>                              | 186 ( $\pm$ 6)                                              | 93.2%            | 20% |

<sup>a</sup>No analyte peaks were observed at the 0  $\mu\text{g L}^{-1}$  standard for either analyte, which is represented by a N/F (for not found) and the accuracy is thus not applicable (N/A).

**Fig. S2** Chromatograms of 0.75 ppb glyphosate, 1.0 ppb glyphosate, 1.0 ppb AMPA, and 2.5 ppb AMPA with respective areas under the curve and accuracy calculations.

0.75 ppb of Glyphosate in EDTA Spiked Hard Water (Area = 1.795E3)

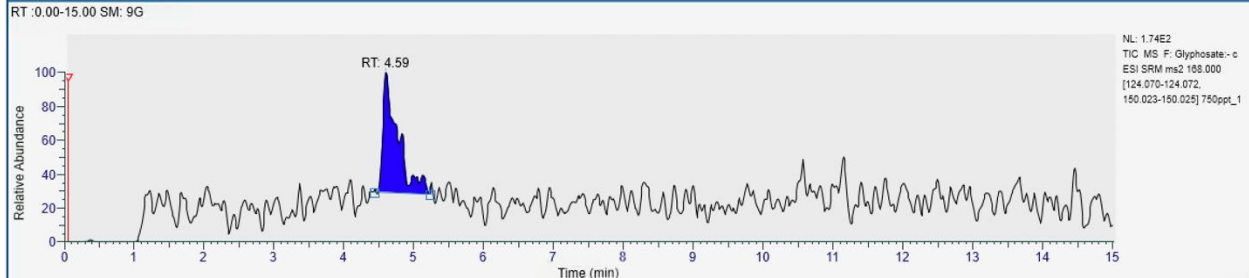

1.0 ppb of Glyphosate in EDTA Spiked Hard Water (Area = 2.309E3)

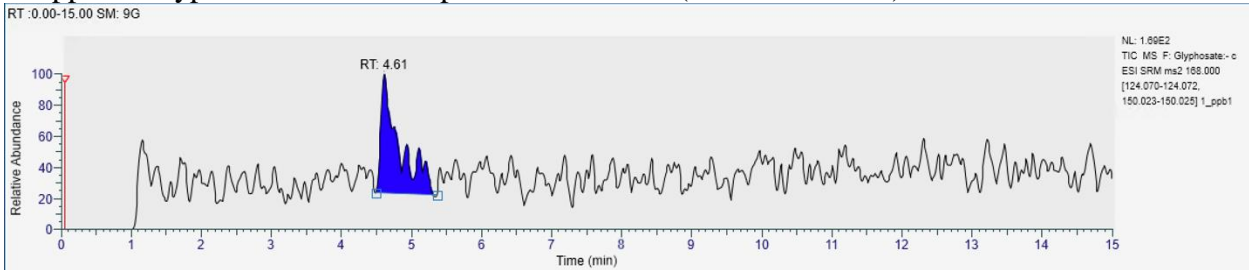

1.0 ppb of AMPA in EDTA Spiked Hard Water (Area = 8.888E2)

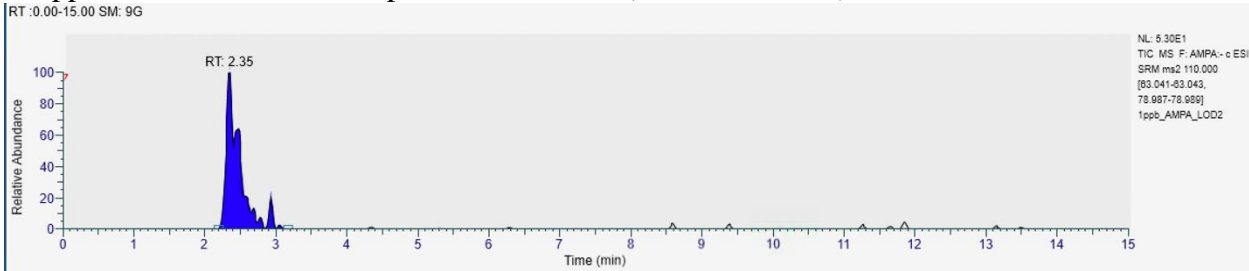

2.5 ppb of AMPA in EDTA Spiked Hard Water (Area = 2.754E3)

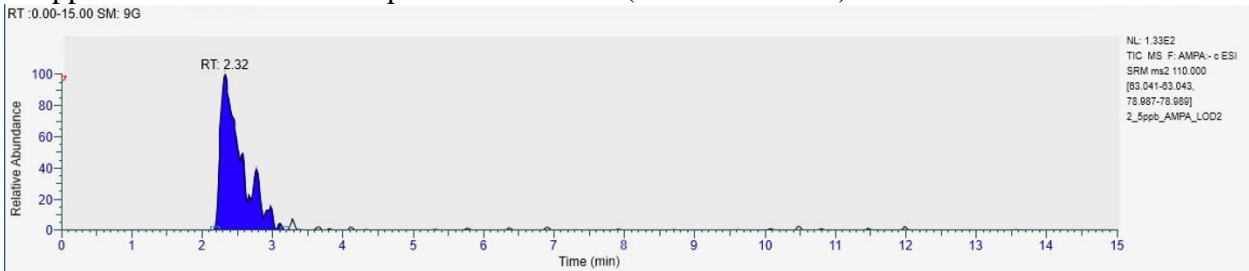

| Glyphosate                     |                                        |                     | AMPA                           |                                        |          |
|--------------------------------|----------------------------------------|---------------------|--------------------------------|----------------------------------------|----------|
| Conc. ( $\mu\text{g L}^{-1}$ ) | Average Conc. ( $\mu\text{g L}^{-1}$ ) | Accuracy            | Conc. ( $\mu\text{g L}^{-1}$ ) | Average Conc. ( $\mu\text{g L}^{-1}$ ) | Accuracy |
| 0.75                           | 0.71 ( $\pm 0.09$ )                    | 94.9 <sub>8</sub> % | 1.0                            | 1.12 ( $\pm 0.09$ )                    | 111%     |
| 1.0                            | 1.07 ( $\pm 0.06$ )                    | 107%                | 2.5                            | 2.51 ( $\pm 0.29$ )                    | 100%     |

**Table S2** Water Hardness of Haw River Water Samples.

| <b>Sample</b>     | <b>Mg Hardness<br/>(mg L<sup>-1</sup> CaCO<sub>3</sub>)</b> | <b>Ca Hardness<br/>(mg L<sup>-1</sup> CaCO<sub>3</sub>)</b> | <b>Total Hardness<br/>(mg L<sup>-1</sup> CaCO<sub>3</sub>)</b> |
|-------------------|-------------------------------------------------------------|-------------------------------------------------------------|----------------------------------------------------------------|
| <b>EWWTTP A</b>   | 7.40                                                        | 10.7                                                        | 18.1                                                           |
| <b>EWWTTP B</b>   | 6.90                                                        | 9.20                                                        | 16.1                                                           |
| <b>SWWTTP</b>     | 7.70                                                        | 11.3                                                        | 19.0                                                           |
| <b>Saxapahaw</b>  | 8.20                                                        | 1.1.0                                                       | 19.2                                                           |
| <b>CCA</b>        | 5.00                                                        | 6.60                                                        | 11.6                                                           |
| <b>CCB</b>        | 4.50                                                        | 7.60                                                        | 12.1                                                           |
| <b>CCC</b>        | 4.10                                                        | 5.50                                                        | 9.6                                                            |
| <b>CCD</b>        | 5.70                                                        | 7.20                                                        | 12.9                                                           |
| <b>Confluence</b> | 5.90                                                        | 9.80                                                        | 15.7                                                           |
| <b>Bynum</b>      | 4.80                                                        | 10.0                                                        | 14.8                                                           |
| <b>Haw 64</b>     | 4.80                                                        | 10.8                                                        | 15.6                                                           |
| <b>Jordan 64</b>  | 4.00                                                        | 8.30                                                        | 12.3                                                           |
| <b>JFP</b>        | 4.80                                                        | 8.00                                                        | 12.8                                                           |

\*LOD of the hardness method is 0.05 mg/L of CaCO<sub>3</sub>

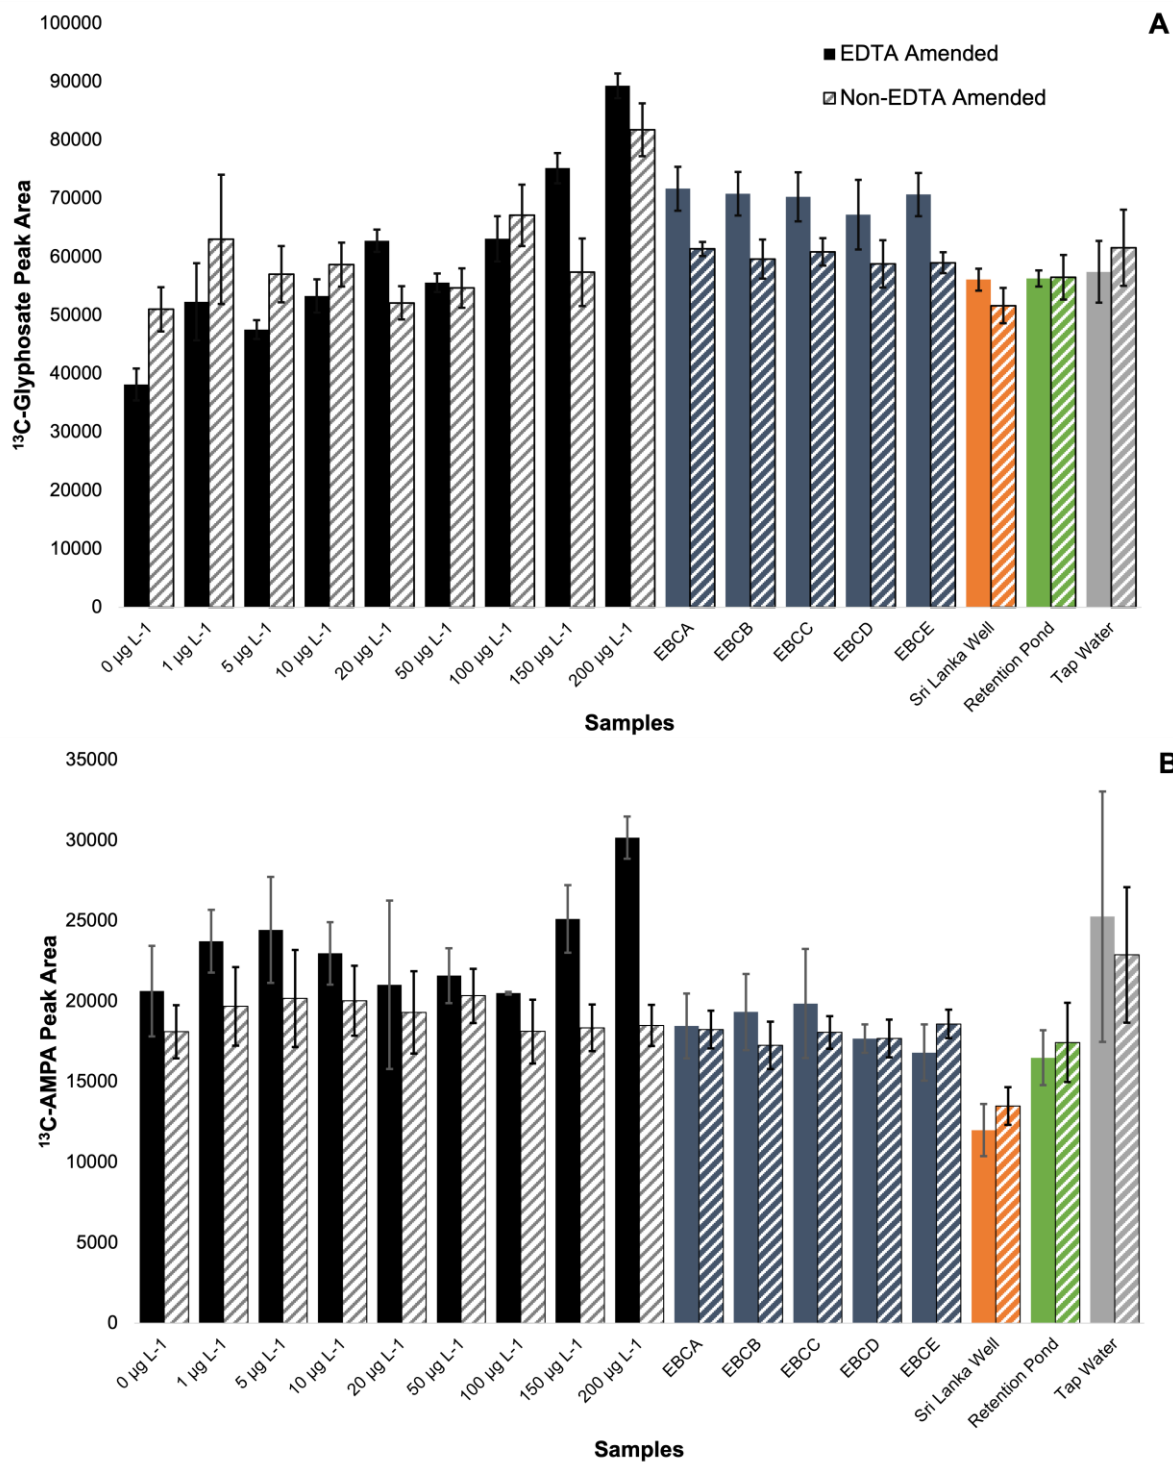

**Fig. S3** Study of matrix effects on ISTD response of <sup>13</sup>C-glyphosate (**A**) and <sup>13</sup>C-AMPA (**B**) in calibration standards (black), Ellerbe Creek Samples (blues), a Sri Lankan Well Water Sample (orange), the Duke Retention Pond (green), and tap water (gray) with EDTA amended (solid color) and non-EDTA amended (cross-hatched). The responses of the glyphosate ISTD and AMPA ISTD were consistent across matrix types and standards, suggesting little matrix effects. The average response areas of both standards were frequently higher for EDTA spiked samples, than non-EDTA spiked samples, suggesting EDTA improved analytes response in samples. Additionally, isotope-dilution mass spectrometry was performed to account for any matrix effects which may have been encountered during analysis.

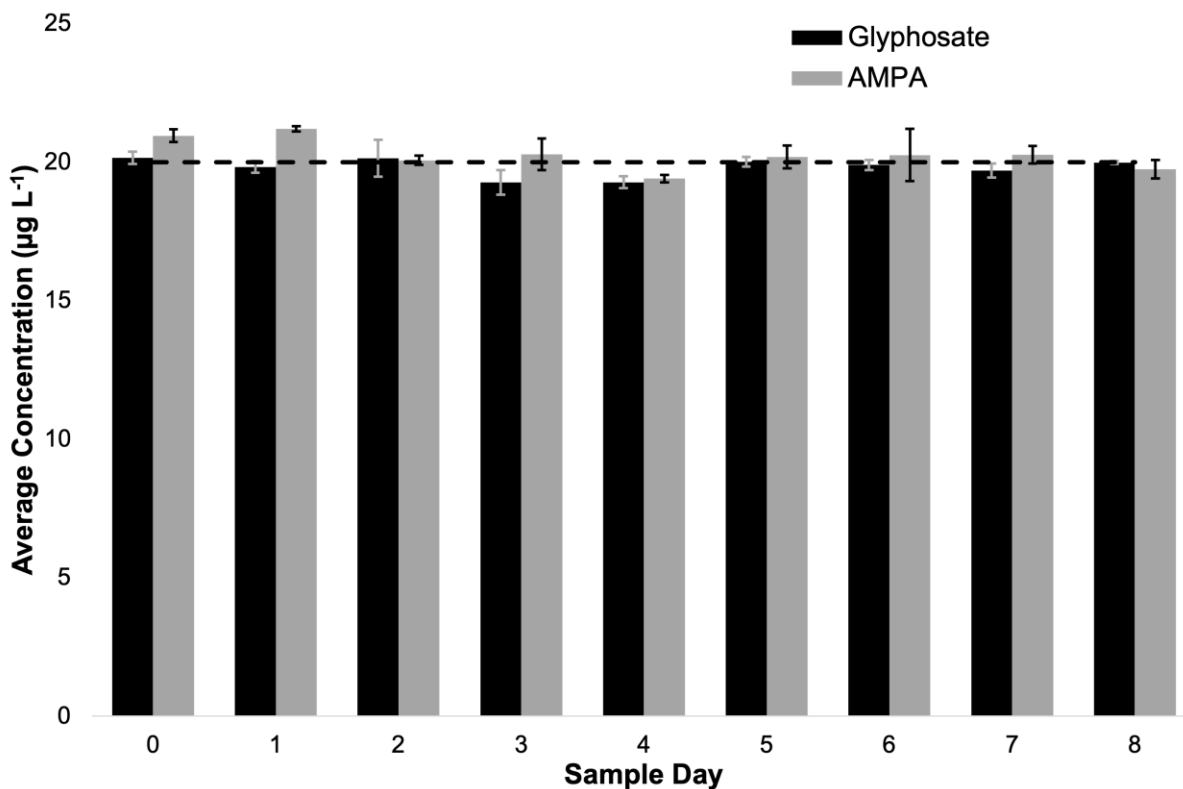

**Fig. S4** Freeze-thaw stability tests analyzing the average concentration of glyphosate (black) and AMPA (gray) over multiple freeze/thaw events. The expected concentration was 20 µg L<sup>-1</sup> and is represented by the dashed lined, error bars represent standard deviation of 3 replicate measurements. The average concentration over 9 freeze/thaw cycles of both analytes was consistent, displaying no apparent decrease in measured concentration or impact of freezing and thawing on glyphosate and AMPA stability.

**Table S3** Confidence Intervals for Haw River Glyphosate and AMPA Analyses

|                         | Glyphosate        |                               |             | AMPA                                             |                               |             |                                                  |
|-------------------------|-------------------|-------------------------------|-------------|--------------------------------------------------|-------------------------------|-------------|--------------------------------------------------|
|                         | Site              | Avg. ( $\mu\text{g L}^{-1}$ ) | Std Dev.    | 95% Confidence Interval ( $\mu\text{g L}^{-1}$ ) | Avg. ( $\mu\text{g L}^{-1}$ ) | Std Dev.    | 95% Confidence Interval ( $\mu\text{g L}^{-1}$ ) |
| <b>Non-EDTA Amended</b> | <b>Bynum</b>      | 20.0                          | 0.6         | 18.6 – 21.5                                      | 33.8                          | 0.8         | 31.9 – 35.7                                      |
|                         | <b>CCA</b>        | 19.3                          | 0.2         | 18.8 – 19.7                                      | 29                            | 2           | 23.6 – 35.1                                      |
|                         | <b>CCB</b>        | 19                            | 2           | 15.3 – 22.7                                      | 28                            | 2           | 24.1 – 32.0                                      |
|                         | <b>CCC</b>        | 21.8                          | 0.8         | 19.8 – 23.9                                      | 33.8                          | 0.4         | 32.7 – 34.8                                      |
|                         | <b>CCD</b>        | 15                            | 1           | 12.5 – 17.3                                      | 22                            | 1           | 18.9 – 24.1                                      |
|                         | <b>Confluence</b> | 19.2                          | 0.2         | 18.7 – 19.7                                      | 35                            | 1           | 32.5 – 37.7                                      |
|                         | <b>EWWTTPA</b>    | 18.7                          | 0.4         | 17.6 – 19.7                                      | 15                            | 2           | 10.8 – 18.8                                      |
|                         | <b>EWWTTPB</b>    | 19.8                          | 0.1         | 19.5 – 20.1                                      | 15.1                          | 0.7         | 13.4 – 16.7                                      |
|                         | <b>Haw 64</b>     | 19.6                          | 0.3         | 18.8 – 20.4                                      | 32.4                          | 0.5         | 31.1 – 33.6                                      |
|                         | <b>Jordan 64</b>  | 19.0                          | 0.1         | 18.7 – 19.4                                      | 32.6                          | 0.4         | 31.7 – 33/5                                      |
|                         | <b>JFP</b>        | 19.2                          | 0.5         | 17.9 – 20.5                                      | 25                            | 2           | 21.4 – 28.8                                      |
|                         | <b>Saxapahaw</b>  | 19                            | 1           | 15.6 – 22.5                                      | 32.2                          | 0.4         | 31.1 – 33.3                                      |
| <b>SWWTP</b>            | 19                | 1                             | 16.4 – 22.1 | 36                                               | 1                             | 32.6 – 38.7 |                                                  |
| <b>EDTA Amended</b>     | Glyphosate        |                               |             | AMPA                                             |                               |             |                                                  |
|                         | Site              | Avg. ( $\mu\text{g L}^{-1}$ ) | Std Dev.    | 95% Confidence Interval ( $\mu\text{g L}^{-1}$ ) | Avg. ( $\mu\text{g L}^{-1}$ ) | Std Dev.    | 95% Confidence Interval ( $\mu\text{g L}^{-1}$ ) |
|                         | <b>Bynum</b>      | 21                            | 1           | 17.9 – 23.6                                      | 20.3                          | 0.9         | 18.0 – 22.5                                      |
|                         | <b>CCA</b>        | 21                            | 1           | 18.5 – 24.0                                      | 21.8                          | 0.8         | 19.9 – 23.7                                      |
|                         | <b>CCB</b>        | 22                            | 1           | 19.7 – 24.9                                      | 21.7                          | 0.3         | 21.0 – 22.4                                      |
|                         | <b>CCC</b>        | 22                            | 1           | 18.4 – 25.3                                      | 25                            | 2           | 20.3 – 30.0                                      |
|                         | <b>CCD</b>        | 22.5                          | 0.6         | 21.1 – 23.9                                      | 26.1                          | 0.7         | 24.3 – 28.0                                      |
|                         | <b>Confluence</b> | 22.4                          | 0.4         | 21.3 – 23.5                                      | 24.3                          | 0.4         | 23.3 – 25.3                                      |
|                         | <b>EWWTTPA</b>    | 20.4                          | 0.7         | 18.7 – 22.1                                      | 22                            | 2           | 17.9 – 26.5                                      |
|                         | <b>EWWTTPB</b>    | 20.3                          | 0.8         | 18.3 – 22.3                                      | 20.4                          | 1.0         | 17.9 – 23.0                                      |
|                         | <b>Haw 64</b>     | 19.7                          | 0.2         | 19.1 – 20.2                                      | 20.7                          | 0.9         | 18.6 – 22.8                                      |
|                         | <b>Jordan 64</b>  | 19.7                          | 0.6         | 18.3 – 21.1                                      | 21                            | 2           | 16.3 – 27.2                                      |
| <b>JFP</b>              | 21.3              | 0.9                           | 19.1 – 23.5 | 25                                               | 1                             | 22.6 – 27.7 |                                                  |
| <b>Saxapahaw</b>        | 20.4              | 0.7                           | 18.5 – 22.2 | 22                                               | 1                             | 19.2 – 24.4 |                                                  |
| <b>SWWTP</b>            | 19.5              | 0.1                           | 19.2 – 19.8 | 21.1                                             | 0.6                           | 19.6 – 22.6 |                                                  |



**Table S4** Water Hardness of Analyzed Water Samples.

| <b>Sample</b>          | <b>Mg Hardness<br/>(mg L<sup>-1</sup> CaCO<sub>3</sub>)</b> | <b>Ca Hardness<br/>(mg L<sup>-1</sup> CaCO<sub>3</sub>)</b> | <b>Total Hardness<br/>(mg L<sup>-1</sup> CaCO<sub>3</sub>)</b> |
|------------------------|-------------------------------------------------------------|-------------------------------------------------------------|----------------------------------------------------------------|
| <b>Tap Water</b>       | 2.62                                                        | <LOD                                                        | 2.62                                                           |
| <b>Retention Pond</b>  | 9.00                                                        | 34.00                                                       | 43                                                             |
| <b>Sri Lankan Well</b> | 124                                                         | 39                                                          | 163                                                            |
| <b>Ellerbe Creek A</b> | 1.88                                                        | <LOD                                                        | 1.88                                                           |
| <b>Ellerbe Creek B</b> | 1.74                                                        | <LOD                                                        | 1.74                                                           |
| <b>Ellerbe Creek C</b> | 1.90                                                        | <LOD                                                        | 1.90                                                           |
| <b>Ellerbe Creek D</b> | 1.76                                                        | <LOD                                                        | 1.76                                                           |
| <b>Ellerbe Creek E</b> | 1.83                                                        | <LOD                                                        | 1.83                                                           |

\*LOD of the hardness method is 0.05 mg/L of CaCO<sub>3</sub>
